# Supplementary material for: Impact of Neurons on Patient-Derived Cardiomyocytes Using Organ-On-A-Chip and iPSC Biotechnologies
Source: MDPI journal article supplement (doi:10.3390/cells11233764), 2022-11-25
Supplement: s1 [file s1]

**Supplemental Table S1: Mass spectrometry elution gradient.**

| HPLC gradient    |   |     |    |    |    |      |    |
|------------------|---|-----|----|----|----|------|----|
| Time (min)       | 0 | 2.5 | 9  | 11 | 12 | 12.5 | 18 |
| % B mobile phase | 0 | 0   | 20 | 98 | 98 | 0    | 0  |

**Supplemental Table S2: MS conditions.**

| MS parameters                       |          |
|-------------------------------------|----------|
| Mode                                | positive |
| Spray voltage                       | 3,500 V  |
| Nebulizer gas                       | Nitrogen |
| Desolvation (nitrogen) sheath gas   | 18 Arb   |
| Aux gas                             | 7 Arb    |
| Ion transfer tube temperature       | 297°C    |
| Vaporizer temperature               | 131°C    |
| Q1 and Q3 resolutions               | 0.7 FWHM |
| Collision gas (CID, argon) pressure | 2 mTorr  |

**Supplemental Table S3: MS ionization, selection, fragmentation and identification parameters**

| Compounds   | Polarity | Precursor (m/z) | Product (m/z) | Collision Energy (V) | RF Lens (V) |
|-------------|----------|-----------------|---------------|----------------------|-------------|
| Dopamine    | positive | 324.14          | 116.11        | 54.24                | 206         |
|             |          |                 | 145.11        | 33.36                |             |
|             |          |                 | 171.05        | 23.90                |             |
| D4-Dopamine | positive | 328.14          | 116.11        | 55.00                | 206         |
|             |          |                 | 128.05        | 48.67                |             |
|             |          |                 | 171           | 20.76                |             |

|                         |          |        |        |       |     |
|-------------------------|----------|--------|--------|-------|-----|
| <b>Adrenalin</b>        | positive | 354.11 | 166.04 | 18.09 | 179 |
|                         |          |        | 171.06 | 27.69 |     |
|                         |          |        | 184.04 | 14.60 |     |
| <b>D6-Adrenaline</b>    | positive | 360.17 | 171.06 | 27.19 | 184 |
|                         |          |        | 172.04 | 18.65 |     |
|                         |          |        | 190.04 | 14.35 |     |
| <b>Noradrenalin</b>     | positive | 340.15 | 116.11 | 55.00 | 215 |
|                         |          |        | 145.11 | 36.19 |     |
|                         |          |        | 171.06 | 24.61 |     |
| <b>C6-Noradrenaline</b> | positive | 346.15 | 145.11 | 36.04 | 226 |
|                         |          |        | 158.11 | 18.34 |     |
|                         |          |        | 171.06 | 25.62 |     |

**Supplemental Table S4: Listing of antibodies used**

|                             | <i>Species</i> | <i>Epitope</i> | <i>Concentration</i> | <i>Reference</i> | <i>Supplier</i> |
|-----------------------------|----------------|----------------|----------------------|------------------|-----------------|
| <b>Cardiac troponin I</b>   | <i>Mouse</i>   | IgG2b          | 1/500                | 4T21             | Hytest          |
| <b>alpha actinin</b>        | <i>Mouse</i>   | IgG1           | 1/1000               | A7732            | Sigma           |
| <b>Beta3 tubulin</b>        | <i>Mouse</i>   | IgG2b          | 1/1000               | T8660            | Sigma           |
| <b>Tyrosine Hydroxylase</b> | <i>Rabbit</i>  |                | 1/500                | AB152            | Merck           |
| <b>Synapsin 1</b>           | <i>Rabbit</i>  |                | 1/200                | ab64581          | Abcam           |
| <b>ChAT</b>                 | <i>Mouse</i>   | IgG2b          | 1/500                | Mab_31384        | Invitrogen      |
| <b>DBH</b>                  | <i>Rabbit</i>  |                | 1/200                | 22806            | Immunostar Inc. |

**Supplemental Figures:**

**Supplemental figure S1.**

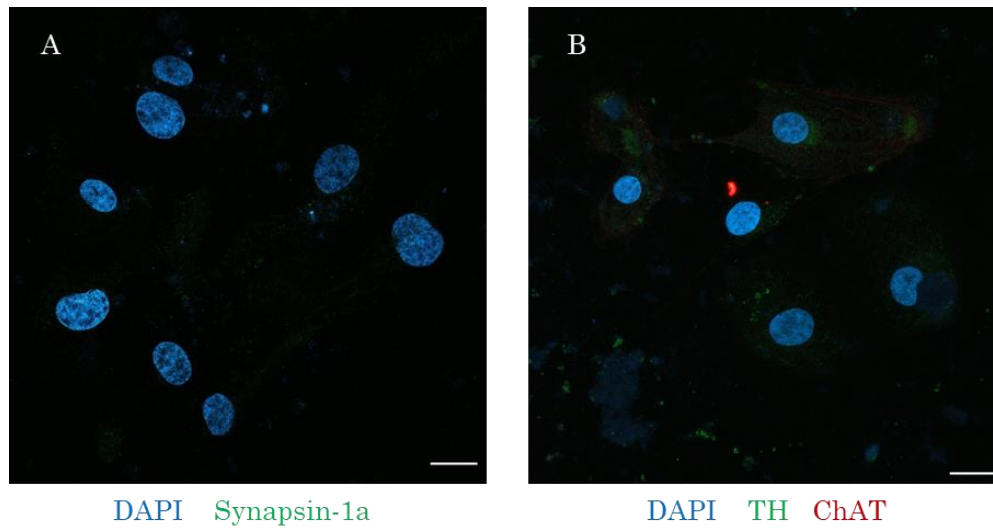

**Supplemental figure S1: hiPSC-CMs alone in OOC do not express synapsin-1a and tyrosine hydroxylase.**

Immunocytochemistry of 30-days-old hiPSC-CMs cultivated alone in OOC. DNA (DAPI) is stained in blue with (A) synapsin-1a in green or (B) tyrosine hydroxylase in green and choline acetyltransferase in red. Scale bar: 20 μm

Supplemental figure S2.

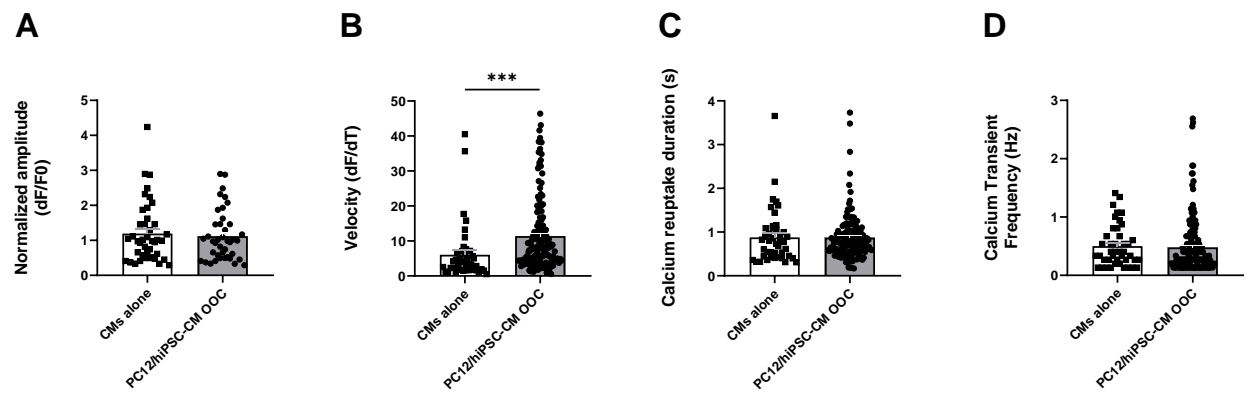

Supplemental Figure S2: SR calcium handling properties in hiPSC-CMs with or without PC12.

Monitoring of the intracellular calcium cycling properties in hiPSC-CMs cultivated on microfluidic devices alone or in presence of PC12 for 14 days. (A) Normalized amplitude of CaT, (B) calcium release velocity, (C) calcium reuptake duration and (D) CaT frequency. Mann Witney test, \*\*\*,  $p < 0.001$ .

Supplemental figure 3.

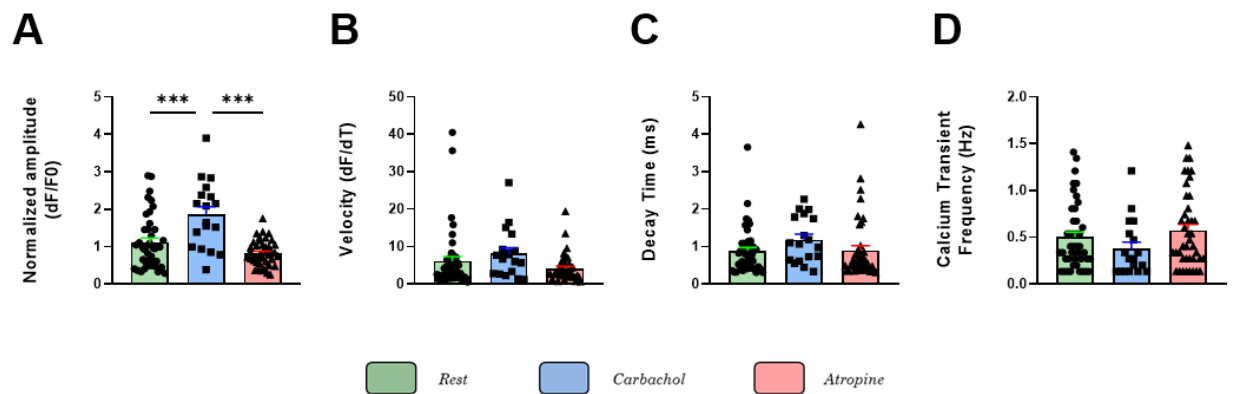

**Supplemental figure 3 : Effect of carbachol and atropine on SR calcium handling of hiPSC-CMs cultivated in absence of PC12 in microfluidic devices.**

Carbachol (1.5 mM) were applied in hiPSC-CMs while atropine (1 $\mu$ M) was applied in neuronal compartment in absence of PC12. (A) Normalized amplitude, (B) calcium release velocity, (C) calcium reuptake duration and (D) CaT frequency. The hiPSC-CMs were cultivated alone on microfluidic devices for 14 days. Tukey's multiple comparisons test, \*\*\*,  $p < 0.001$ .
